# Supplementary material
Source: PubMed Central journal article supplement (PMC7095946)
Supplement: 125_2015_3700_MOESM1_ESM.pdf [file 125_2015_3700_MOESM1_ESM.pdf]

# ESM Fig. 1

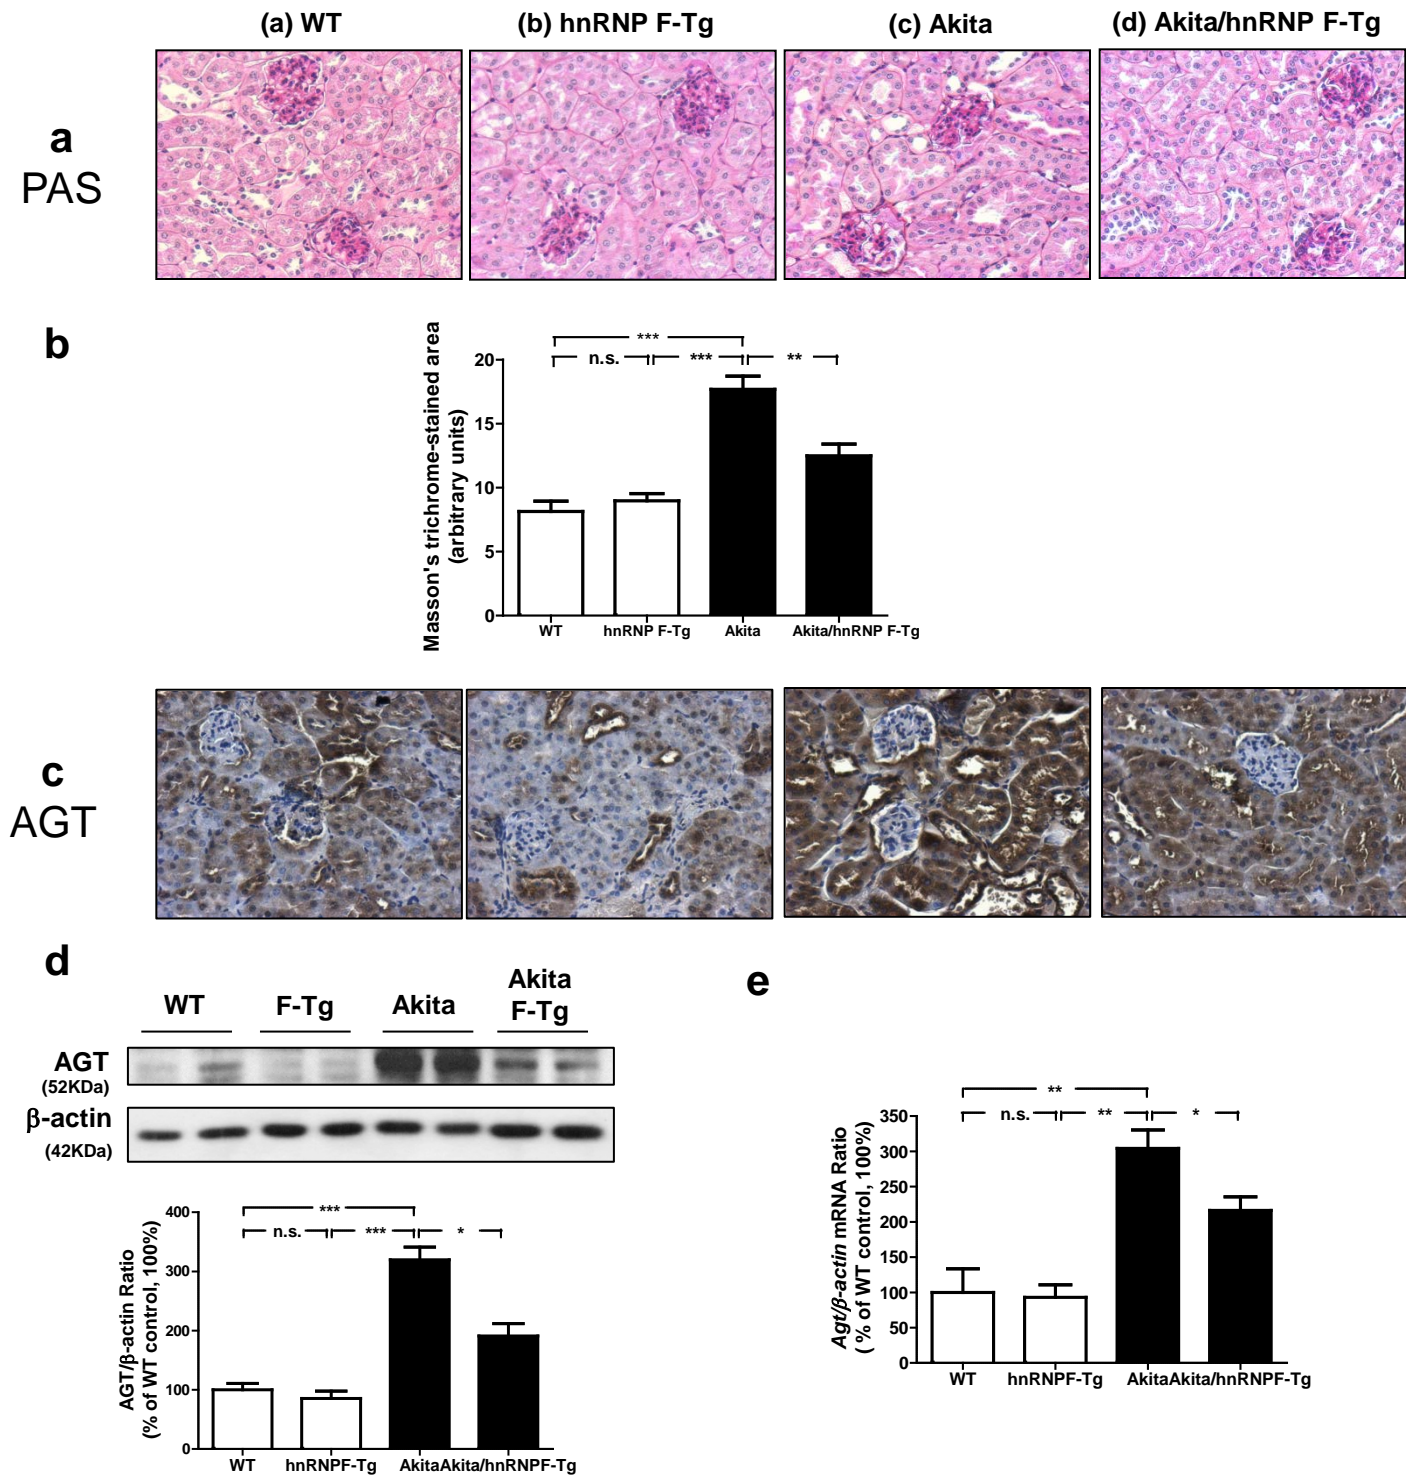

ESM Fig. 1. (a) Periodic acid Schiff (PAS) staining in kidneys of WT control, hnRNP-Tg, Akita and Akita hnRNP F-Tg mice. (b) Semi-quantitative analysis of Masson's trichrome staining in glomerulo-tubular areas of kidneys of WT control, hnRNP-Tg, Akita and Akita hnRNP F-Tg mice. Immunohistochemical staining (c), Western blotting (d) and qPCR (e) of Agt expression in kidneys of WT control, hnRNP-Tg, Akita and Akita hnRNP F-Tg mice. Values are mean+SEM corrected to  $\beta$ -actin, n=6. (\* $p$ <0.05; \*\* $p$ <0.01; NS, not significant).
