# Supplementary material
Source: PubMed Central journal article supplement (PMC7095946)
Supplement: 125_2015_3700_MOESM3_ESM.pdf [file 125_2015_3700_MOESM3_ESM.pdf]

ESM Table 1 (Antibody)

| <b>Antibody</b>      | <b>Host</b>       | <b>Dilution for WB</b> | <b>Dilution for IHC</b> | <b>Supplier<br/>(Antibody validated by the supplier unless indicated)</b>                                   |
|----------------------|-------------------|------------------------|-------------------------|-------------------------------------------------------------------------------------------------------------|
| hnRNP F              | Rabbit polyclonal | 1:10000                | 1:200                   | specifically recognizing hnRNP F (CTARRYIGIVKQAGLER) were generated and validated in our labo <sup>25</sup> |
| ACE-2                | Goat polyclonal   | 1 :2000                | 1 :100                  | R&D Systems                                                                                                 |
| MasR (MAS1)          | Rabbit polyclonal | 1 :2000                | 1 :100                  | Novus biologicals                                                                                           |
| ACE                  | Goat polyclonal   | 1:2000                 | 1:100                   | Santa Cruz Biotechnology                                                                                    |
| TGFβ1                | Rabbit polyclonal | 1 :2000                | 1 :100                  | Santa Cruz Biotechnology                                                                                    |
| TGF beta Receptor II | Rabbit polyclonal | 1:2000                 | 1:100                   | Santa Cruz Biotechnology                                                                                    |
| TGF beta Receptor I  | Rabbit polyclonal | 1 :2000                | 1 :100                  | Novus biologicals                                                                                           |
| Collagen type IV     | Mouse Monoclonal  |                        | 1 :100                  | Millipore                                                                                                   |
| Fibronectin I        | Rabbit polyclonal | 1 :2000                | 1 :100                  | Sigma-Aldrich                                                                                               |
| Collagen type I      | Rabbit polyclonal |                        | 1 :100                  | Abcam                                                                                                       |
| Agt                  | Rabbit polyclonal | 1:2000                 | 1:200                   | specifically recognizing Agt were generated and validated in our lab [1]                                    |
| p-Smad 2/3           | Rabbit polyclonal | 1 :2000                |                         | Cell signaling                                                                                              |
| Smad 2/3             | Rabbit polyclonal | 1 :2000                |                         | Chemicon                                                                                                    |
| β-Actin              | Mouse Monoclonal  | 1 :20000               |                         | Sigma-Aldrich                                                                                               |
|                      |                   |                        |                         |                                                                                                             |

1. Wang L, Lei C, Zhang SL et al. Synergistic effect of dexamethasone and isoproterenol on the expression of angiotensinogen in immortalized rat proximal tubular cells. *Kidney international* 1998; 53: 287-295
