# Supplementary material
Source: PubMed Central journal article supplement (PMC7095946)
Supplement: 125_2015_3700_MOESM4_ESM.pdf [file 125_2015_3700_MOESM4_ESM.pdf]

ESM Table 2 (Primers)

| Gene                                                              | Primer sequences                                                                                                                      | Species      | Reference Sequence                      |
|-------------------------------------------------------------------|---------------------------------------------------------------------------------------------------------------------------------------|--------------|-----------------------------------------|
| <i>Hnrnp f</i>                                                    | S:AGAGTGACCGGAGAAGCTGA<br>AS:GCTCTCCAGGCCACTGTAAG                                                                                     | Mouse<br>Rat | NM_133834.2<br>NM_001037286.1           |
| HA-tag                                                            | AS:GGCGTAGTCAGGCACGTCGT                                                                                                               |              |                                         |
| AKITA<br>( <i>Ins 2</i> )                                         | S:TGCTGATGCCCTGGCCTGCT<br>AS:TGGTCCCACATATGCACATG                                                                                     | Mouse        | NC_000073.6                             |
| <i>Ace</i>                                                        | S:GACCGGACAGCCCAAGTG<br>AS:AGCTTCCTTATGATCCGCTTGATG                                                                                   | Mouse        | NM_207624.5                             |
| <i>Ace</i>                                                        | S:GAGCCATCCTTCCCTTTTC<br>AS:GGCTGCAGCTCCTGGTATAG                                                                                      | Rat          | NM_012544.1                             |
| <i>Ace2</i>                                                       | S:ATATGACTCAAGGATTCTGGG<br>AS:GCTGCAGAAAGTGACATGATT                                                                                   | Mouse        | NM_001130513.1                          |
| <i>Ace2</i>                                                       | S:GCCAAAAGATGAACGAGGC<br>AS:GACGCTTGATGGTGCATTCC                                                                                      | Rat          | NM_001012006.1                          |
| <i>MasR</i>                                                       | S:GCATTCGTCTGTGCCCTTCT<br>AS:TTCCGTATCTTACCACCAAGA                                                                                    | Mouse        | NM_008552.4                             |
| <i>MasR</i>                                                       | S:TTGACAGCGGAGAAGAGAGTCA<br>AS:TCCGTATCTTACCACCAAGATG                                                                                 | Rat          | NM_012757.2                             |
| <i>Tgf-β1</i>                                                     | S:CCTAACTAAGGCTCGCCAGTC<br>AS:GGCACTGCTTCCCGAATGTC                                                                                    | Mouse        | NM_011577.1                             |
| <i>Tgf-β1</i>                                                     | S:ATACGCCTGAGTGGCTGTCT<br>AS:TGGGACTGATCCCATTGATT                                                                                     | Rat          | NM_021578.2                             |
| <i>Tgf-β RI</i>                                                   | S:ATTGCCAGGACCATTGTGTTAC<br>AS:TCTCTGCCTCTCGGAACCAT                                                                                   | Mouse        | NM_009370.2                             |
| <i>Tgf-β RI</i>                                                   | S:ATTGCAAGGACCATTGTGCTAC<br>AS:TCTCTGCCTCTCGGAACCAT                                                                                   | Rat          | NM_012775.2                             |
| <i>Tgf-β RII</i>                                                  | S:TCGTTCAAGCAGACGGATGT<br>AS:ATCTTCTCCTGGGAGCAGCT                                                                                     | Mouse        | NM_009371.3                             |
| <i>Tgf-β RII</i>                                                  | S:AGTTTTGCGACGTGACACTG<br>AS:GGCATCTTCCAGAGTGAAGC                                                                                     | Rat          | NM_031132.3                             |
| <i>Col4α1</i>                                                     | S:CATGTCCATGGCACCCATCT<br>AS:ATGGCCGGTGCTTACAAAC                                                                                      | Mouse        | NM_009931.2                             |
| <i>Col4α1</i>                                                     | S:CCATCTGTGGACCATGGCTT<br>AS:GCGAAGTTGCAGACGTTGTT                                                                                     | Rat          | NM_001135009.1                          |
| <i>FN1</i>                                                        | S:GGCCTGAACCAGCCTACAG<br>AS:TGAGCTTAAAGCCAGCGTCA                                                                                      | Mouse        | NM_010233.2                             |
| <i>FN1</i>                                                        | S:GGGAAGAAAAGGAGCCCAGG<br>AS:CCTCTTGCTCTTCCCGGTTT                                                                                     | Rat          | NM_019143.2                             |
| <i>Col1α1</i>                                                     | S:ATCTCCTGGTGCTGATGGAC<br>AS:ACCTTGTTTGCCAGGTTTAC                                                                                     | Mouse        | NM_007742.3                             |
| <i>β-actin</i>                                                    | S:ATGCCATCCTGCGTCTGGAC<br>AS:AGCATTGCGGTGCACGATGG                                                                                     | Mouse<br>Rat | NM_007393.3<br>NM_031144.2              |
| Rat <i>Ace2</i><br>promoter                                       | S :CGAACGCGTCACGATCTCATGCCTATGG<br>S :AAGATCTCTGAGTTAGAGGCTAGCCTCAT<br>S :AAGGTACCTAACCAAATGTCCAAGTTTGA<br>AS : CTTTCCCCTGCGCCAAGATCC | Rat          | -1091<br>-499<br>-240<br>+83            |
| Rat <i>Ace2</i><br>promoter Smad<br>binding element 1<br>(GAGACA) | S:AATCAATTTTTTTTCGTTTTTAGGGTTTCTTT<br>GTATAGCCCTAG<br>AS:CTAGGGCTATACAAAGAAACCCTAAAAACG<br>AAAAAAATTGATT                              |              | Site directed<br>mutagenesis<br>primers |
| Rat <i>Ace2</i><br>promoter Smad<br>binding element 2             | S:TGATCCCAGCACTCAGGAGGAGCAGATCTC<br>TGAGTTAGAGGC                                                                                      |              | Site directed<br>mutagenesis<br>primers |

ESM Table 2 (Primers)

|                                                                   |                                                                       |  |                                   |
|-------------------------------------------------------------------|-----------------------------------------------------------------------|--|-----------------------------------|
| (CAGAGACA)                                                        | AS:GCCTCTAACTCAGAGATCTGCTCCTCCTGAGTGCTGGGATCA                         |  |                                   |
| Rat <i>Ace2</i> promoter<br>hnRNPF binding element<br>(GGGGAGAGG) | S: AAGGAAGAGAGAAAAAGAGGATGGATCGC<br>AS: GCGATCCATCCTCTTTTTCTCTCTTCCTT |  | Site directed mutagenesis primers |
| <i>Hnrnpf</i> -RE probe                                           | S:AGAAAGGGGAGAGGAAGAGG<br>AS:CCTCTTCCTCTCCCCTTTCT                     |  | Biotinylated probe for EMSA       |
| <i>SMAD-RE1</i> probe                                             | S:CGTTTTTAGAGACAGGGTTTCT<br>AS: AGAAACCCTGTCTCTAAAAACG                |  | Biotinylated probe for EMSA       |
| <i>SMAD-RE2</i> probe                                             | S:CAGGAGGCAGAGACAAGCAGAT<br>AS:ATCTGCTTGTCTCTGCCTCCTG                 |  | Biotinylated probe for EMSA       |
| <i>Hnrnpf</i> -RE (WT)                                            | S:AGAAAGGGGAGAGGAAGAGG<br>AS:CCTCTTCCTCTCCCCTTTCT                     |  | Competitor                        |
| <i>Hnrnpf</i> -RE (M1)                                            | S:AGAAAGGaaAGAGGAAGAGG<br>AS:CCTCTTCCTCTtCCTTTCT                      |  | Competitor                        |
| <i>Hnrnpf</i> -RE (M2)                                            | S:AGAAAGGGGaaAGGAAGAGG<br>AS:CCTCTTCCTtTCCCCTTTCT                     |  | Competitor                        |
| <i>Hnrnpf</i> -RE (M3)                                            | S:AGAAAGGGGAGaaAAGAGG<br>AS:CCTCTTtTCTCCCCTTTCT                       |  | Competitor                        |
| <i>Hnrnpf</i> -RE (M4)                                            | S:AAGGAAGAGAGAAAAAGAGGATGGATCGC<br>AS: GCGATCCATCCTCTTTTTCTCTCTTCCTT  |  | Competitor                        |
| <i>SMAD-RE1</i> (WT)                                              | S:CGTTTTTAGAGACAGGGTTTCT<br>AS:AGAAACCCTGTCTCTAAAAACG                 |  | Competitor                        |
| <i>SMAD-RE1</i> (M1)                                              | S : CGTTTTTAGActCAGGGTTTCT<br>AS : AGAAACCCTGagTCTAAAAACG             |  | Competitor                        |
| <i>SMAD-RE1</i> (M2)                                              | S : CGTTTTTAGAGActGGGTTTCT<br>AS : AGAAACCCaGTCTCTAAAAACG             |  | Competitor                        |
| <i>SMAD-RE2</i> (WT)                                              | S:CAGGAGGCAGAGACAAGCAGAT<br>AS:ATCTGCTTGTCTCTGCCTCCTG                 |  | Competitor                        |
| <i>SMAD-RE2</i> (M1)                                              | S : CAGGAGGCActGACAAGCAGAT<br>AS : ATCTGCTTGTcagTGCCTCCTG             |  | Competitor                        |
| <i>SMAD-RE2</i> (M2)                                              | S : CAGGAGGCAGActCAAGCAGAT<br>AS : ATCTGCTTgagTCTGCCTCCTG             |  | Competitor                        |
